# Supplementary material
Source: PubMed Central journal article supplement (PMC3162107)
Supplement: NIHMS286607-supplement-01.pdf [file NIHMS286607-supplement-01.pdf]

## Supplementary Appendix A

PS 1 was a 25-year-old man who suffered a severe head injury in a motor vehicle accident two years prior to the study. Initial treatment was supportive. He remained comatose for approximately 4 weeks before transitioning to vegetative state (VS). 3 months post-injury he showed evidence of awareness of environment through visual tracking. At the time of study, 25 months post-injury, he was considered to be in a locked-in state (LIS) as he could communicate with yes / no responses via blinks or side-to-side head movements. Otherwise, his brain injury and peripheral contractures left him unable to vocalize or gesture. At the time of the study PS 1 was taking escitalopram, bromocriptine and baclofen.

PS 2 was a 19-year-old woman who sustained a severe head injury from a fall. The fall resulted in a left epidural hematoma complicated by cerebral edema with central herniation, and an initial Glasgow Coma Scale (Teasdale and Jennett, 1974) was 3. During the hospitalization from the injury, the hematoma was evacuated and bilateral craniectomies were performed to relieve increased intracranial pressure. This was followed by a 5-month period of inconsistent evidence of responsiveness as documented in medical records. The patient then underwent a left-sided cranioplasty, with subsequent recovery of ability to follow simple motor commands. 6 months after injury, our first study was performed. At that time, the right craniectomy remained open, and the patient met diagnostic criteria for minimal conscious state (MCS) as she consistently followed commands and could manipulate objects, but had no functional communication or object use. Testing using the Coma Recovery Scale Revised (CRS-R) (Giacino et al., 2004), showed a best total score of 14 (auditory 4, visual 3, motor 4, oro/motor 0, communication 1, and arousal 2). 8 months after injury, a right-sided cranioplasty restored the integrity of the entire skull. 10 months after injury, our second study was performed. At that time the patient demonstrated evidence of emergence from MCS based on recovery of functional object use, consistent communication, and improved attentional function (best CRS-R total score of 20 - auditory 4, visual 4, motor 6, oro/motor 2, communication 2, and arousal 2). In addition, physiological measurements using FDG-PET and resting state fMRI across the two visits showed marked changes (Voss et al., in press). A global increase in cerebral glucose utilization was seen, with regional increases in left mesial frontal cortex and the paramedian diencephalon. The resting state fMRI also changed in that the auditory resting-state network was identifiable only at the second visit. At the time of the studies, PS 2 was taking amantadine, modafinil, methylphenidate, levetiracetam (prophylactic only) and tizanidine (visit 2 only).

PS 3 was a 24-year-old woman who sustained a basilar artery thrombosis resulting in infarctions of the upper brainstem, bilateral central thalami, and left

medial temporal and occipital lobes as well as a resultant seizure disorder. Initial treatment consisted of seizure management and anticoagulation. The patient's clinical course was notable for a two-year period during which no evidence of command following had been noted and the presence of intermittent epileptic seizures, followed by discovery of an ability to communicate through eye movement. At the time of the first study reported here, 30 months after the infarct, the patient demonstrated intermittent evidence of communication consisting only of downward left eye movements as a "yes" response. At the second assessment, one year later, a brief period of control of an inward movement of the left eye to signal "no" was demonstrated; a more consistent use of this system had been established prior to the visit in the context of ongoing work with a speech therapist. At both visits, she had fluctuating arousal levels with periods of no behavioral response to commands. When she was responsive, she was able to move her left eye to command and showed evidence of orientation to self, location and situation, indicating a clinical status in the range of MCS to severe or moderate cognitive disability. A 2 to 3 Hz tremor of her jaw and face was present on both visits. During the second assessment, the patient's EEG showed frequent epileptiform activity and she had two clinical seizures. At the time of the studies PS 3 was taking amantadine and levetiracetam (visits 1 and 2) and modafinil and hyoscyamine (visit 2 only).

## References

- Giacino JT, Kalmar K, Whyte J. The JFK Coma Recovery Scale-Revised: Measurement characteristics and diagnostic utility. *Arch Phys Med Rehabil* 2004;85:2020-2029.
- Teasdale G, Jennett B. Assessment of coma and impaired consciousness : A Practical Scale. *Lancet* 1974;304:81-84.
- Voss HU, Heier LA, Schiff ND. Multimodal imaging of recovery of functional networks associated with reversal of paradoxical herniation after cranioplasty. *Clin Imaging*, In Press. doi:10.1016/j.clinimag.2010.07.008.

# HC 3 Motor Imagery

● Swim > Rest

○ Rest > Swim

Run 1

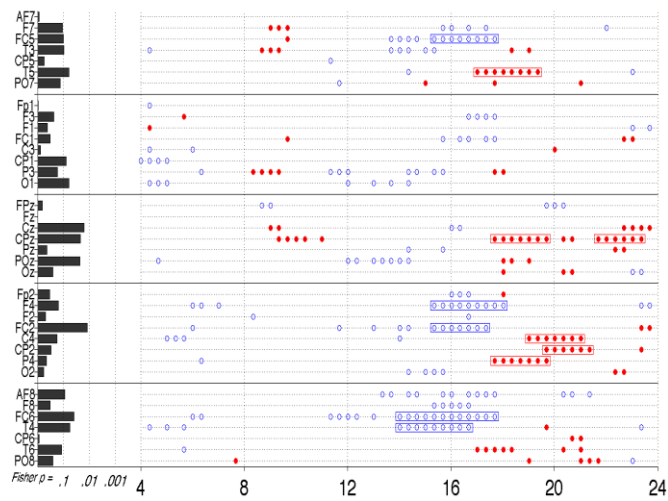

Run 2

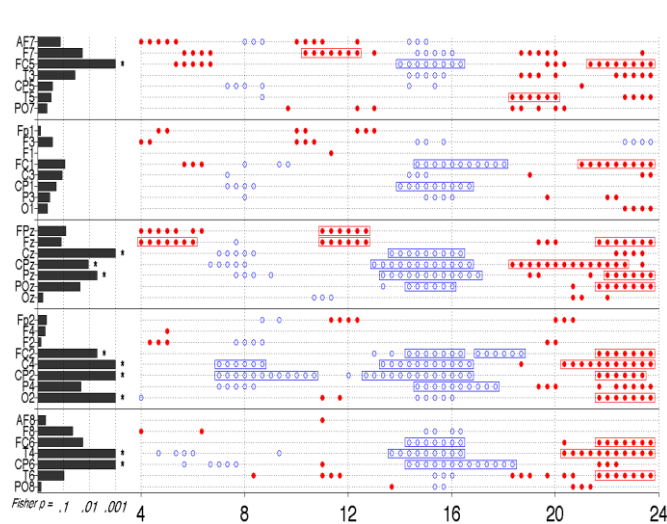

Run 3

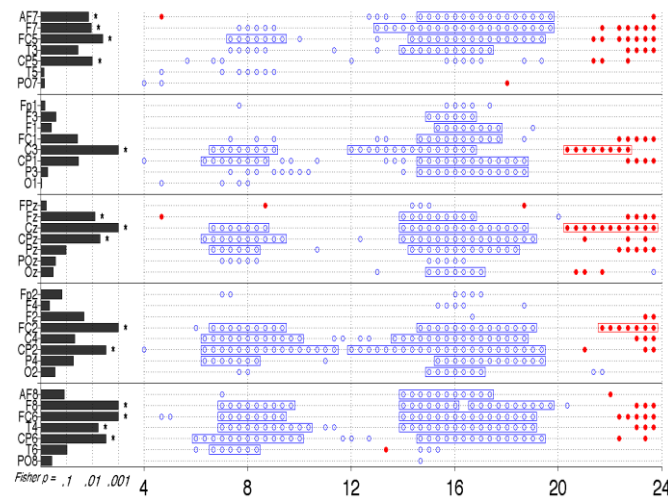

Run 4

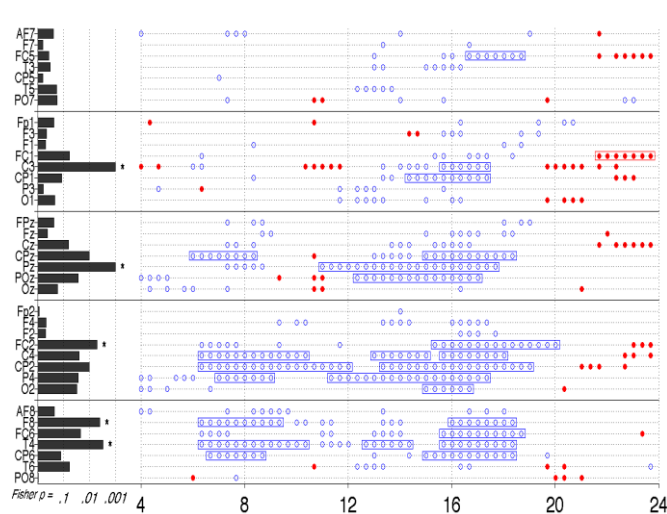

## HC 4 Motor Imagery

● Swim > Rest  
○ Rest > Swim

Run 1

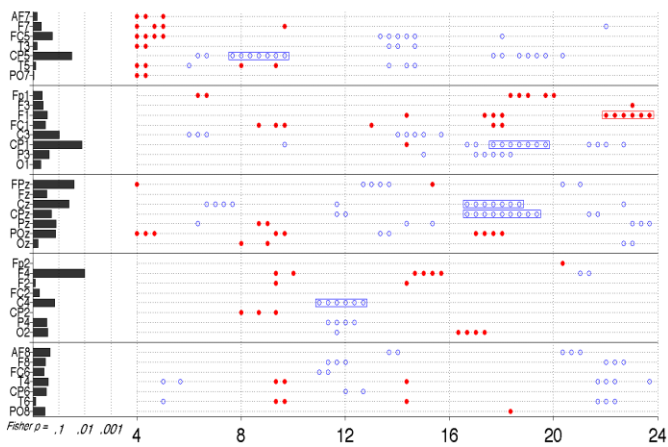

Run 2

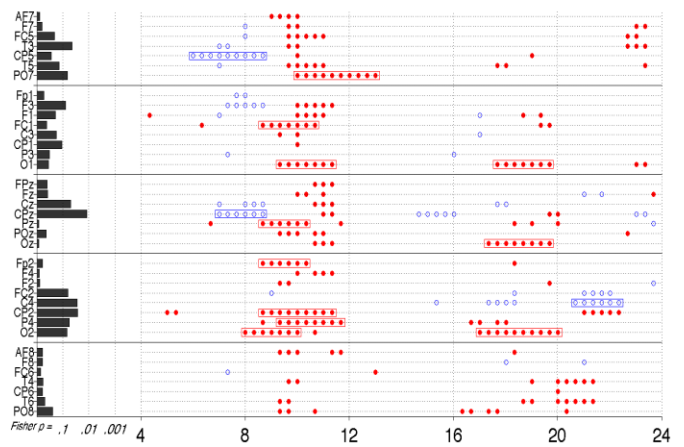

Run 3

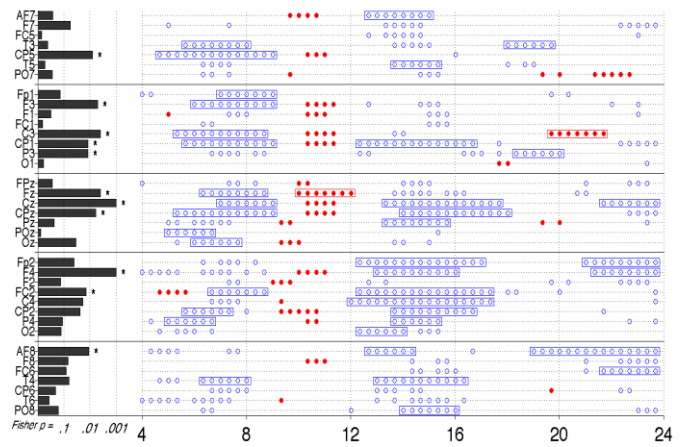

# HC 1 Navigation Imagery

● Nav > Rest  
○ Rest > Nav

Run 1

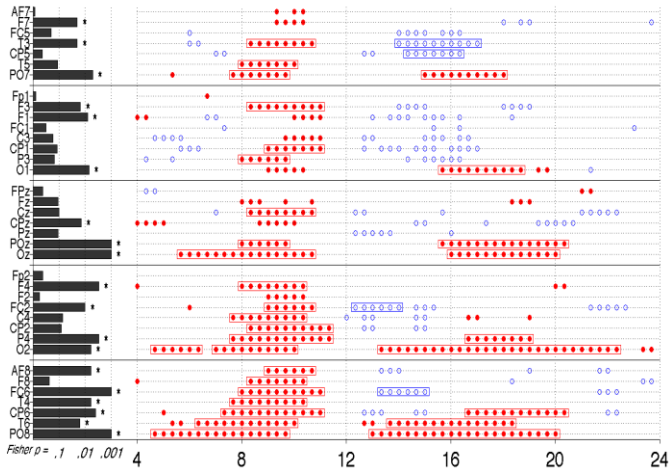

Run 2

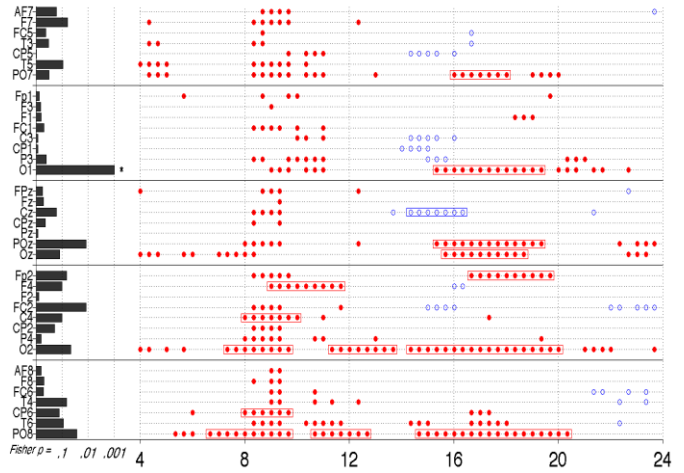

Run 3

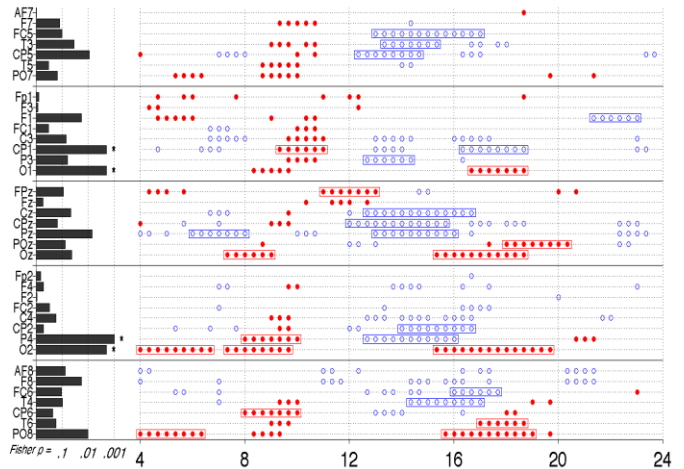

# HC 2 Navigation Imagery

● Nav > Rest  
○ Rest > Nav

Run 1

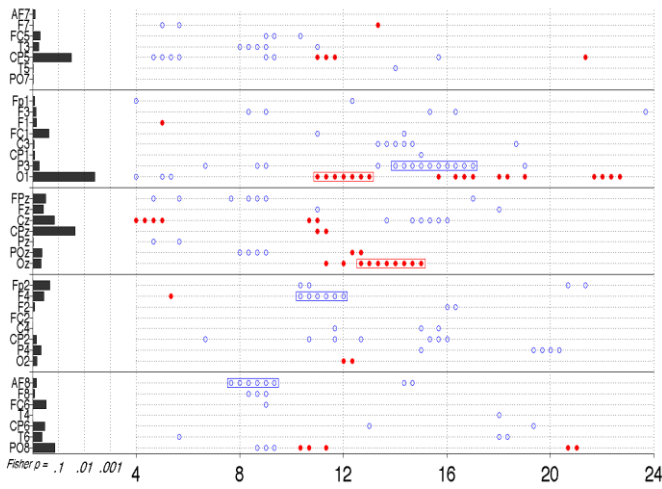

Run 2

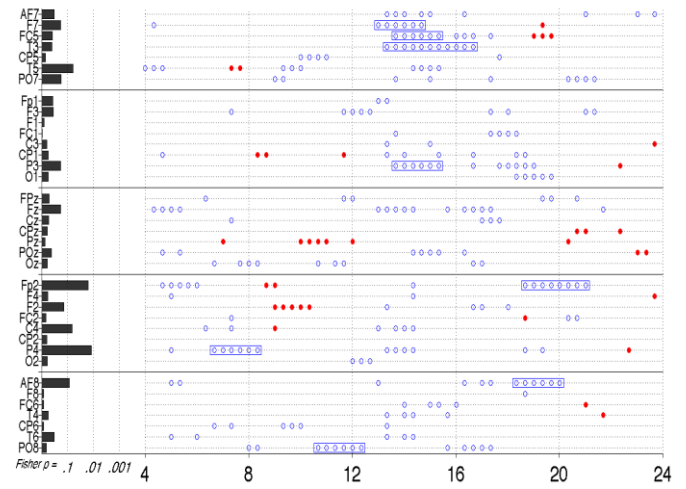

Run 3

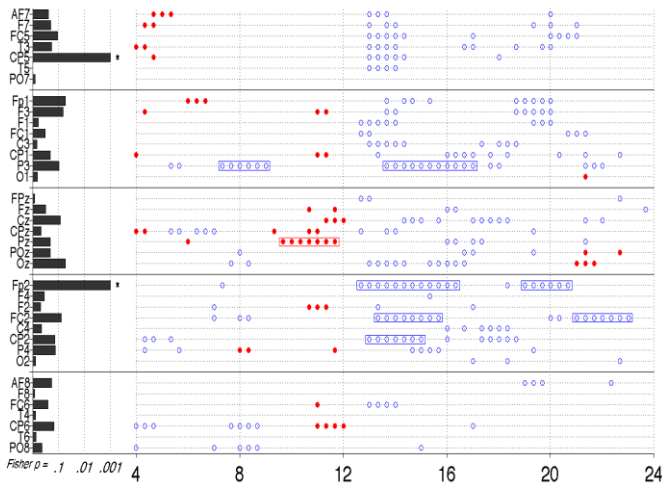

Run 4

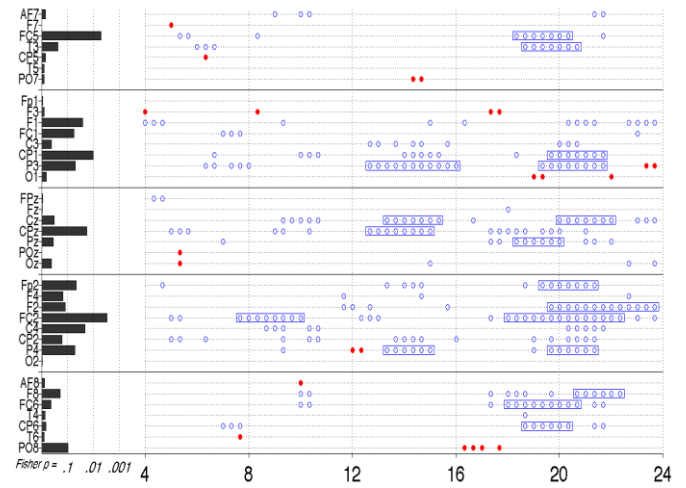



## HC 4 Navigation Imagery

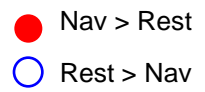

Run 1

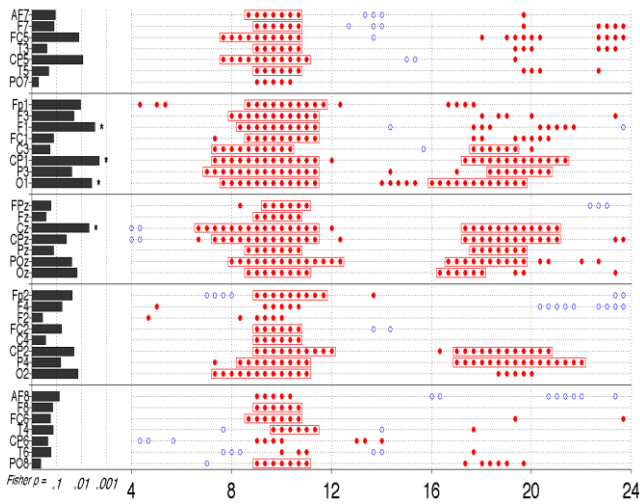

Run 2

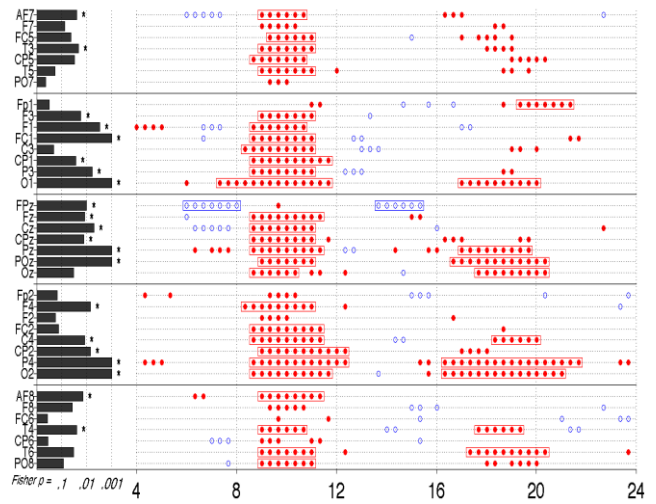

Run 3

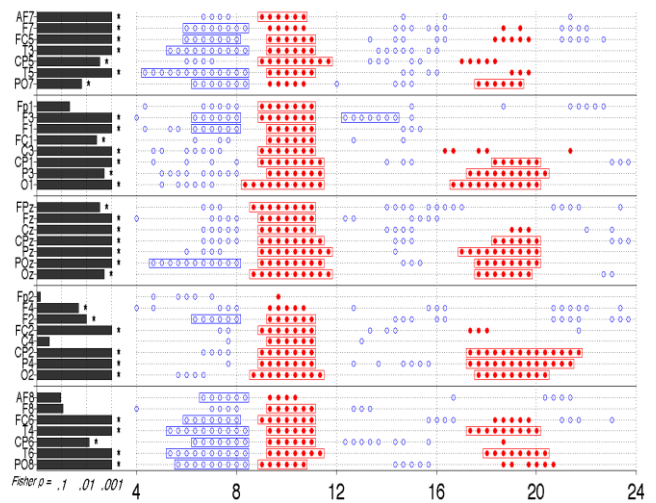



# HC 5 Navigation Imagery

● Nav > Rest

○ Rest > Nav

Run 1

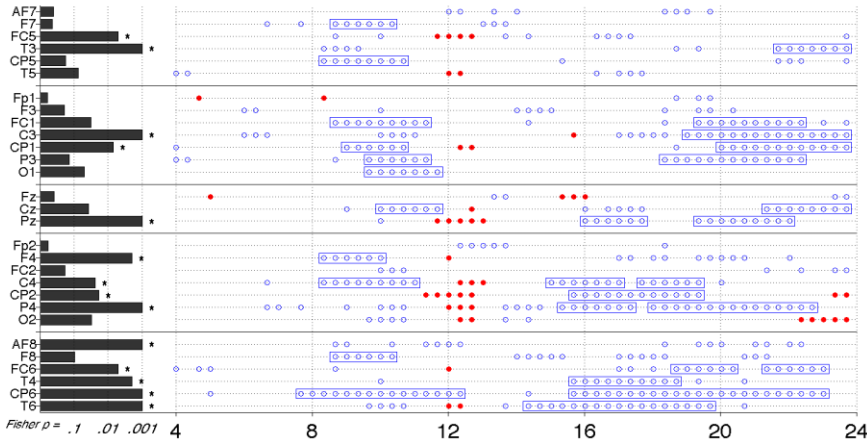

Run 2

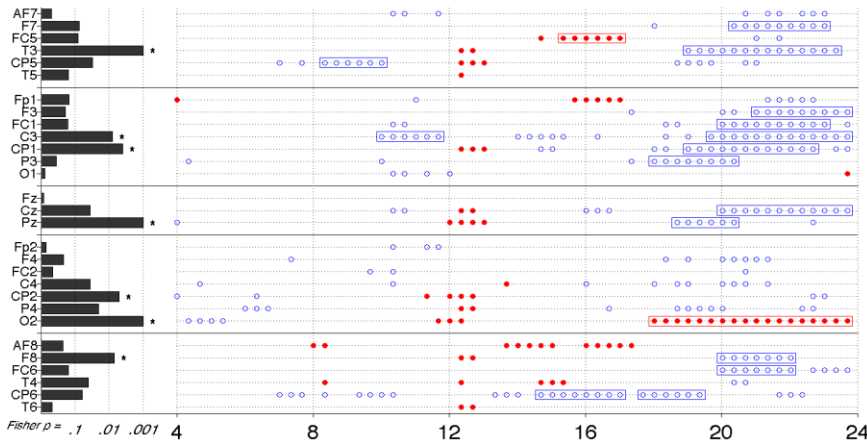



# PS 3 Visit 1 Navigation Imagery

● Nav > Rest  
○ Rest > Nav

Run 1

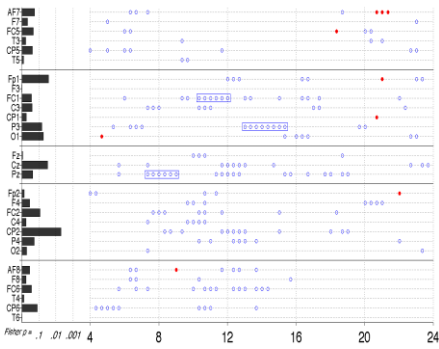

Run 2

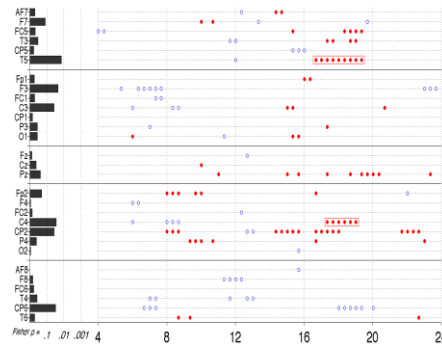

Run 3

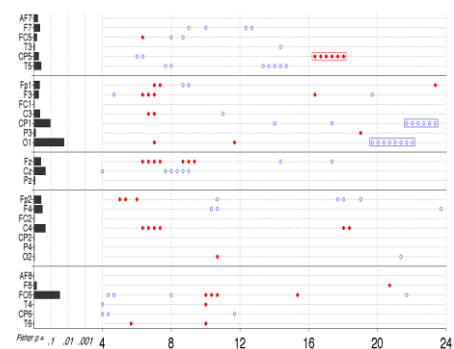

Run 4

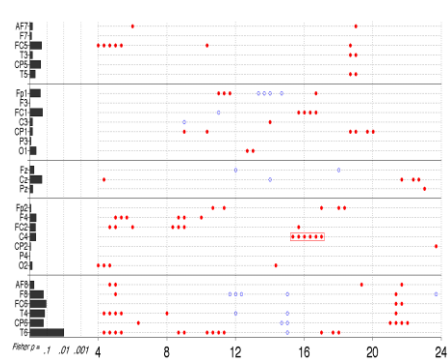

All runs combined.

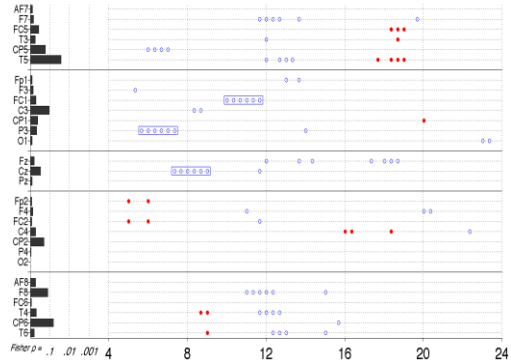

# PS 3 Visit 2 Motor Imagery

Run 1

Run 2

● Swim > Rest  
○ Rest > Swim

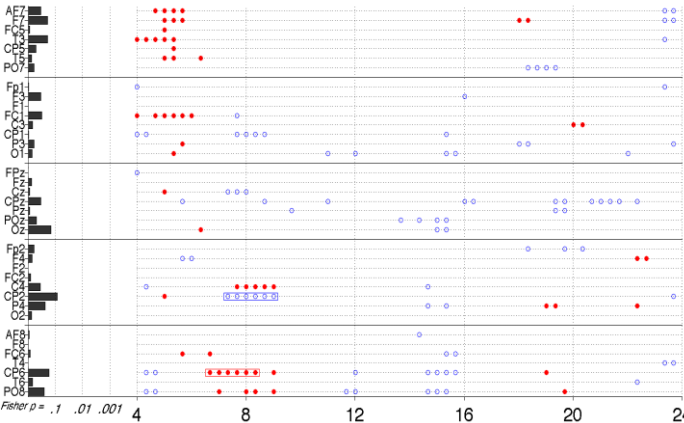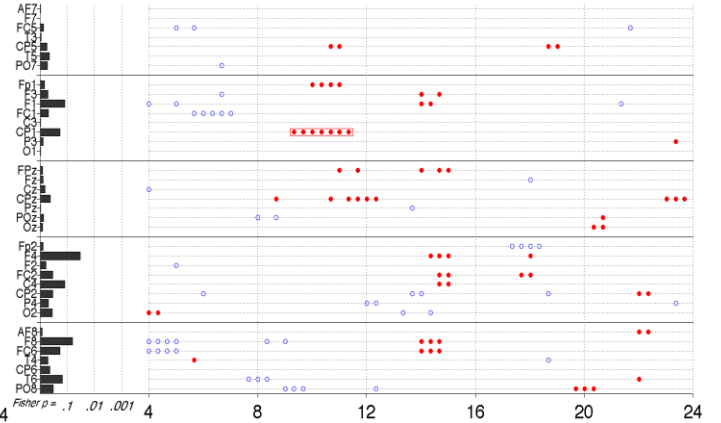

Run 3

All runs combined

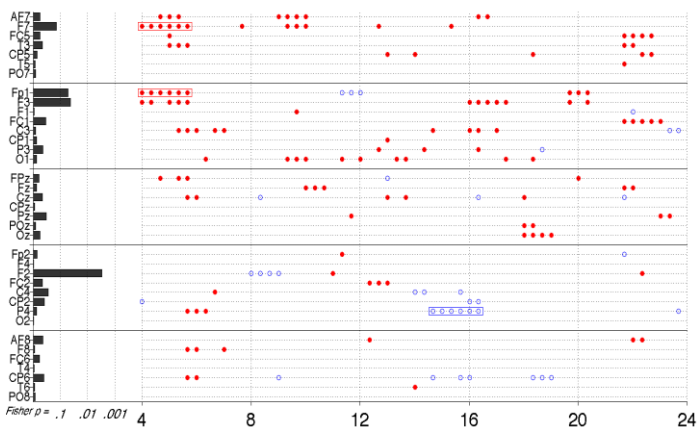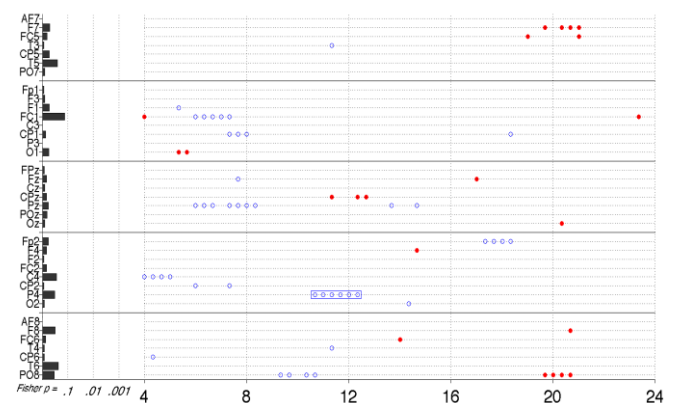

● Nav > Rest  
 ○ Rest > Nav

# PS 3 Visit 2 – Navigation Imagery

Run 1

Run 2

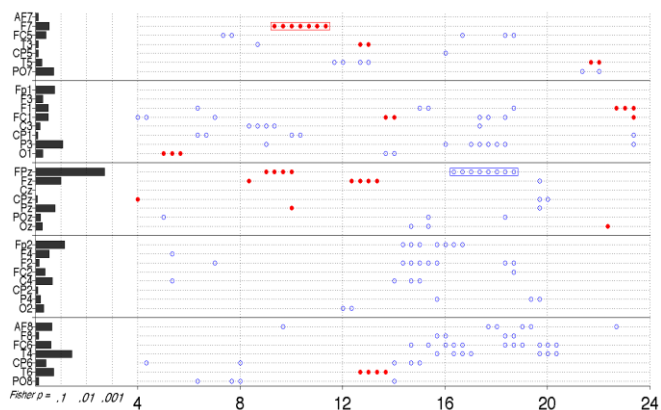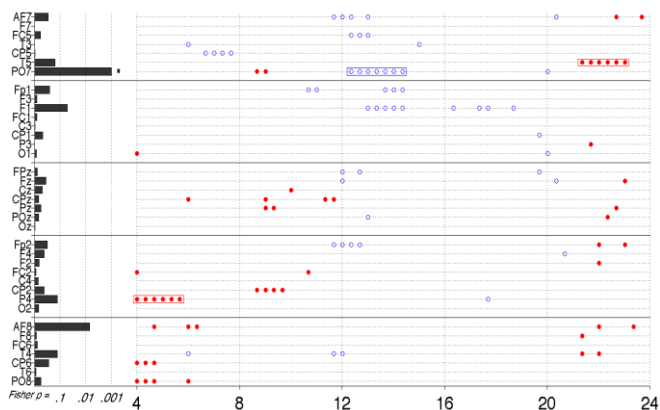

Run 3

All runs combined

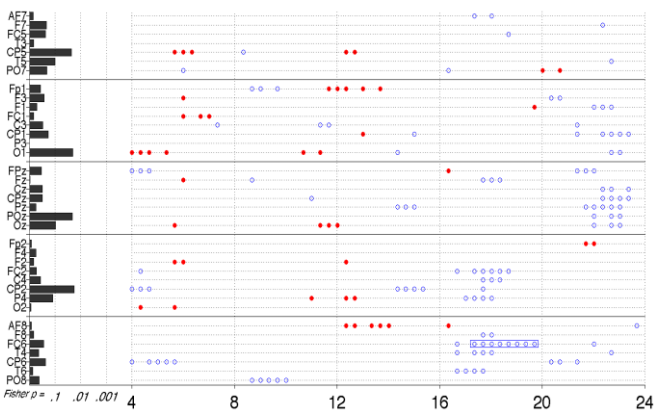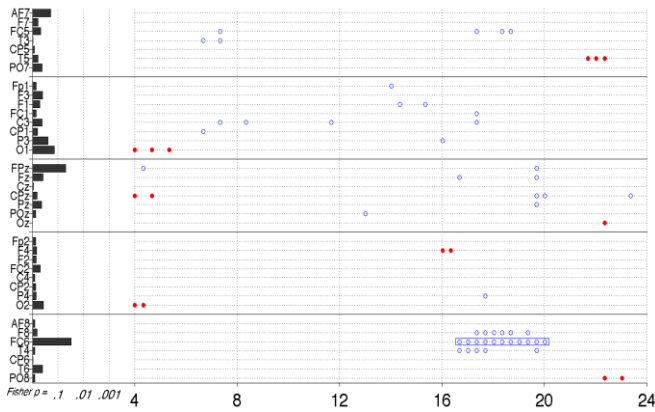

## Supplementary Table S1

## Supplementary Table S1

| Subject      | Task  | Run | Snippets<br>Used (max<br>48) | ICA<br>Components<br>Rejected | Percentage<br>Variance<br>Removed |
|--------------|-------|-----|------------------------------|-------------------------------|-----------------------------------|
| HC1          | Motor | 1   | 48                           | 10                            | 32                                |
|              |       | 2   | 48                           | 9                             | 32                                |
|              |       | 3   | 48                           | 7                             | 32                                |
|              | Nav   | 1   | 48                           | 13                            | 44                                |
|              |       | 2   | 48                           | 15                            | 46                                |
|              |       | 3   | 48                           | 13                            | 56                                |
| HC2          | Motor | 1   | 48                           | 8                             | 48                                |
|              |       | 2   | 48                           | 15                            | 67                                |
|              |       | 3   | 48                           | 17                            | 88                                |
|              |       | 4   | 48                           | 17                            | 86                                |
|              | Nav   | 1   | 48                           | 21                            | 89                                |
|              |       | 2   | 48                           | 20                            | 83                                |
|              |       | 3   | 48                           | 19                            | 85                                |
|              |       | 4   | 48                           | 19                            | 85                                |
| HC3          | Motor | 1   | 48                           | 5                             | 21                                |
|              |       | 2   | 48                           | 9                             | 36                                |
|              |       | 3   | 48                           | 10                            | 30                                |
|              |       | 4   | 48                           | 9                             | 25                                |
|              | Nav   | 1   | 48                           | 9                             | 36                                |
|              |       | 2   | 48                           | 11                            | 29                                |
|              |       | 3   | 48                           | 9                             | 25                                |
|              |       | 4   | 48                           | 5                             | 24                                |
| HC4          | Motor | 1   | 48                           | 12                            | 61                                |
|              |       | 2   | 48                           | 12                            | 48                                |
|              |       | 3   | 48                           | 12                            | 19                                |
|              | Nav   | 1   | 48                           | 14                            | 32                                |
|              |       | 2   | 48                           | 12                            | 41                                |
|              |       | 3   | 48                           | 14                            | 30                                |
| HC5          | Nav   | 1   | 48                           | 2                             | 24                                |
|              |       | 2   | 48                           | 6                             | 57                                |
| PS1          | Motor | 1   | 45                           | 17                            | 46                                |
|              |       | 2   | 30                           | 16                            | 56                                |
| PS2 (visit1) | Motor | 1   | 48                           | 20                            | 91                                |
|              |       | 2   | 48                           | 16                            | 83                                |
|              |       | 3   | 48                           | 7                             | 84                                |
| PS2 (visit2) | Motor | 1   | 48                           | 11                            | 93                                |
|              |       | 2   | 48                           | 18                            | 95                                |
|              |       | 3   | 48                           | 11                            | 82                                |
|              |       | 4   | 48                           | 12                            | 85                                |
|              |       | 5   | 48                           | 11                            | 78                                |
|              |       | 6   | 48                           | 10                            | 81                                |
| PS3 (visit1) | Motor | 1   | 48                           | 7                             | 25                                |
|              |       | 2   | 48                           | 8                             | 24                                |
|              |       | 3   | 48                           | 5                             | 23                                |
|              |       | 4   | 48                           | 5                             | 23                                |
|              | Nav   | 1   | 48                           | 10                            | 37                                |
|              |       | 2   | 48                           | 5                             | 22                                |
|              |       | 3   | 48                           | 7                             | 29                                |
|              |       | 4   | 48                           | 6                             | 20                                |
| PS3 (visit2) | Motor | 1   | 48                           | 18                            | 66                                |
|              |       | 2   | 48                           | 14                            | 19                                |
|              |       | 3   | 48                           | 9                             | 18                                |
|              | Nav   | 1   | 48                           | 17                            | 52                                |
|              |       | 2   | 48                           | 14                            | 24                                |
|              |       | 3   | 27                           | 12                            | 14                                |
